# Supplementary material for: Ultrasonication assisted fabrication of a tungsten sulfide/tungstite heterostructure for ppb-level ammonia detection at room temperature
Source: Royal Society of Chemistry journal article supplement (doi:10.1039/d0ra02553d), 2020-01-01
Supplement: d0ra02553d1.pdf [file d0ra02553d1.pdf]

## † Electronic Supporting Information (†ESI)

Ultrasonication Assisted Fabrication of Tungsten Sulfide/Tungstite Heterostructure  
for ppb-level Ammonia Detection at Room Temperature

*Ravindra Kumar Jha,<sup>a</sup> Aman Nanda,<sup>a</sup> and Navakanta Bhat<sup>\*a</sup>*

<sup>a</sup>Nano-Devices and Sensors Laboratory, Centre for Nanoscience and Engineering, Indian  
Institute of Science, Bangalore, Karnataka, India-560012

Email: [navakant@iisc.ac.in](mailto:navakant@iisc.ac.in)

**Table S1. Comparison of our sensor with recently reported room temperature chemiresistive sensing devices for NH<sub>3</sub> detection**

| <b>Material</b>                                                 | <b>Measured Ammonia Range (in ppm)</b> | <b>Response (%)</b> | <b>Response Recovery (Seconds)</b> | <b>Time/Time</b> | <b>Experimental LOD (ppb)</b> | <b>Ref.</b> | <b>Year of Report</b> |
|-----------------------------------------------------------------|----------------------------------------|---------------------|------------------------------------|------------------|-------------------------------|-------------|-----------------------|
| Polyaniline                                                     | 1-100                                  | 11 @ 1 ppm          | 24/72 @ 100 ppm                    |                  | 1000                          | [S1]        | 2019                  |
| TiO <sub>2</sub> /Ti <sub>3</sub> C <sub>2</sub> T <sub>x</sub> | 0.5-10                                 | 3.1 @ 10 ppm        | 33/277 @ 10 ppm                    |                  | 500                           | [S2]        | 2019                  |
| Au/Graphene                                                     | 2-250                                  | 34 @ 25 ppm         | 224/178 @ 25 ppm                   |                  | 2000                          | [S3]        | 2019                  |
| RGO/W S <sub>2</sub>                                            | 10-50                                  | 121 @ 10 ppm        | 60/300 @ 30 ppm                    |                  | 10000                         | [S4]        | 2019                  |
| MoS <sub>2</sub> /CuO                                           | 5-500                                  | 47 @ 100 ppm        | 17/26 @ 100 ppm                    |                  | 5000                          | [S5]        | 2018                  |
| PANI/CeO <sub>2</sub>                                           | 0.16-50                                | 262.7 @ 50 ppm      | ~348/1020 @ 10 ppm                 |                  | 16                            | [S6]        | 2018                  |
| RGO/CuFe <sub>2</sub> O <sub>4</sub>                            | 5-200                                  | 2 @ 5 ppm           | 3/6 @ 50 ppm                       |                  | 5                             | [S7]        | 2018                  |
| WS <sub>2</sub> /W O <sub>3</sub> .H <sub>2</sub> O             | 0.05-3                                 | 11.36 @50 ppb       | 55.76/23.36 @2 ppm                 |                  | 50                            | This Work   | 2020                  |

## Supplementary Note 1

Gas sensing data for the device is shown in Figure S1. The unexpected behavior for 3 ppm ammonia is repeatable and hence we suggest the operating range of the device to be 50 ppb – 2 ppm.

Figure S1. Gas sensing data of the  $WS_2/WO_3.H_2O$  based gas sensor towards ammonia gas (green arrow: ammonia gas on; red arrow: ammonia gas off and dry air on).

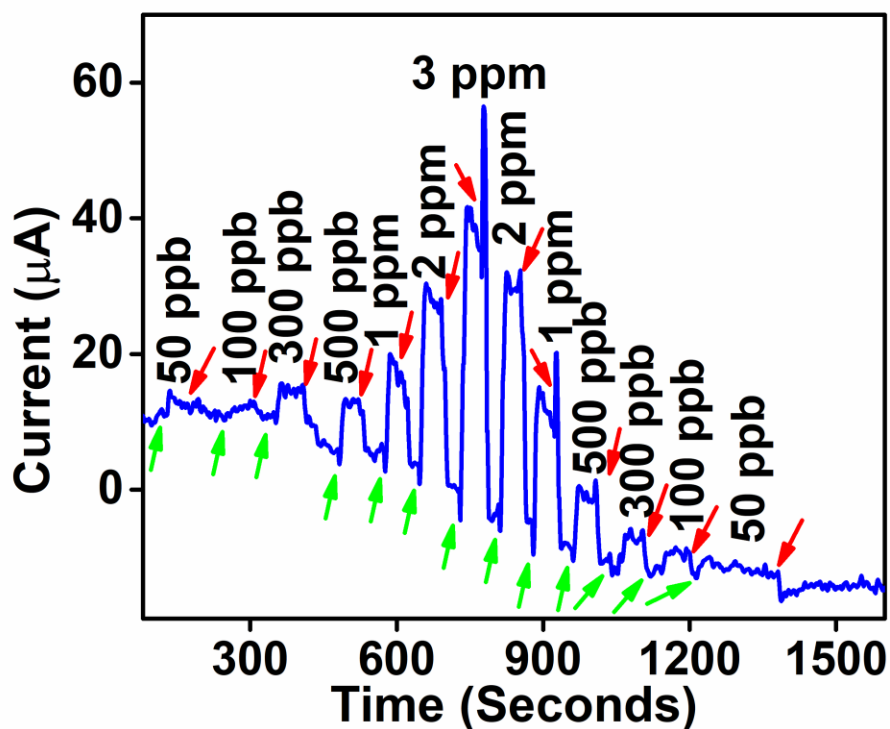

## Supplementary References

- S1.** Kulkarni, S. B.; Navale, Y. H.; Navale, S. T.; Stadler, F. J.; Patil, V. B. J. J. o. M. S. M. i. E., *J. Mater. Sci.: Mater. Electron.* **2019**, *30* (9), 8371-8380. DOI <https://doi.org/10.1007/s10854-019-01154-x>.
- S2.** Tai, H.; Duan, Z.; He, Z.; Li, X.; Xu, J.; Liu, B.; Jiang, Y., *Sensors and Actuators B: Chemical* **2019**, *298*, 126874. DOI <https://doi.org/10.1016/j.snb.2019.126874>.
- S3.** Seifaddini, P.; Ghasempour, R.; Ramezannezhad, M.; Nikfarjam, A., *Materials Research Express* **2019**, *6* (4), 045054. DOI <https://doi.org/10.1088/2053-1591/aafbc4>.
- S4.** Wang, X.; Gu, D.; Li, X.; Lin, S.; Zhao, S.; Rumyantseva, M. N.; Gaskov, A. M., *Sensors and Actuators B: Chemical* **2019**, *282*, 290-299. DOI <https://doi.org/10.1016/j.snb.2018.11.080>.
- S5.** Sharma, S.; Kumar, A.; Singh, N.; Kaur, D., *Sensors and Actuators B: Chemical* **2018**, *275*, 499-507. DOI <https://doi.org/10.1016/j.snb.2018.08.046>.
- S6.** Liu, C.; Tai, H.; Zhang, P.; Yuan, Z.; Du, X.; Xie, G.; Jiang, Y., *Sensors and Actuators B: Chemical* **2018**, *261*, 587-597. DOI <https://doi.org/10.1016/j.snb.2017.12.022>.
- S7.** Achary, L. S. K.; Kumar, A.; Barik, B.; Nayak, P. S.; Tripathy, N.; Kar, J. P.; Dash, P., *Sensors and Actuators B: Chemical* **2018**, *272*, 100-109. DOI <https://doi.org/10.1016/j.snb.2018.05.093>.
